# Supplementary material for: Use of epidermal growth factor receptor antibody–gold cluster conjugates with good renal excretion in targeted cancer radiation treatment
Source: Royal Society of Chemistry journal article supplement (doi:10.1039/c5tb00411j), 2015-01-01
Supplement: c5tb00411j1.pdf [file c5tb00411j1.pdf]

## Supporting Information

# Renal Excreted Au clusters-EGFR antibody for targeted cancer radiation therapy

Xiao-Dong Zhang<sup>a</sup>, Jie Chen<sup>a</sup>, Jiang Yang<sup>b</sup>, Jun-Ying Wang<sup>a</sup>, Xiu Shen<sup>a</sup>, Sha-Sha Song<sup>a</sup>, Hao Wang<sup>a</sup>, Hua He<sup>c</sup>, Xiaojuan Wang<sup>c</sup>, Saijun Fan<sup>a</sup>, Yuan-Ming Sun<sup>a</sup>, Meili Guo<sup>d</sup>,

<sup>a</sup>Tianjin Key Laboratory of Molecular Nuclear Medicine, Institute of Radiation Medicine, Chinese Academy of Medical Sciences and Peking Union Medical College, No. 238, Baidi Road, Tianjin 300192, China

<sup>b</sup>Department of Biological Systems Engineering, University of Wisconsin-Madison, Madison, WI, USA

<sup>c</sup>Centre for Bioengineering and Biotechnology, China University of Petroleum (East China), 66 Changjiang West Road, Qingdao 266555, China.

<sup>d</sup>Department of Physics, School of Science, Tianjin Chengjian University, No. 26, Jinjing Road, Tianjin 300384, China

KEYWORDS: Gold clusters; Renal clearance; Target radiation therapy

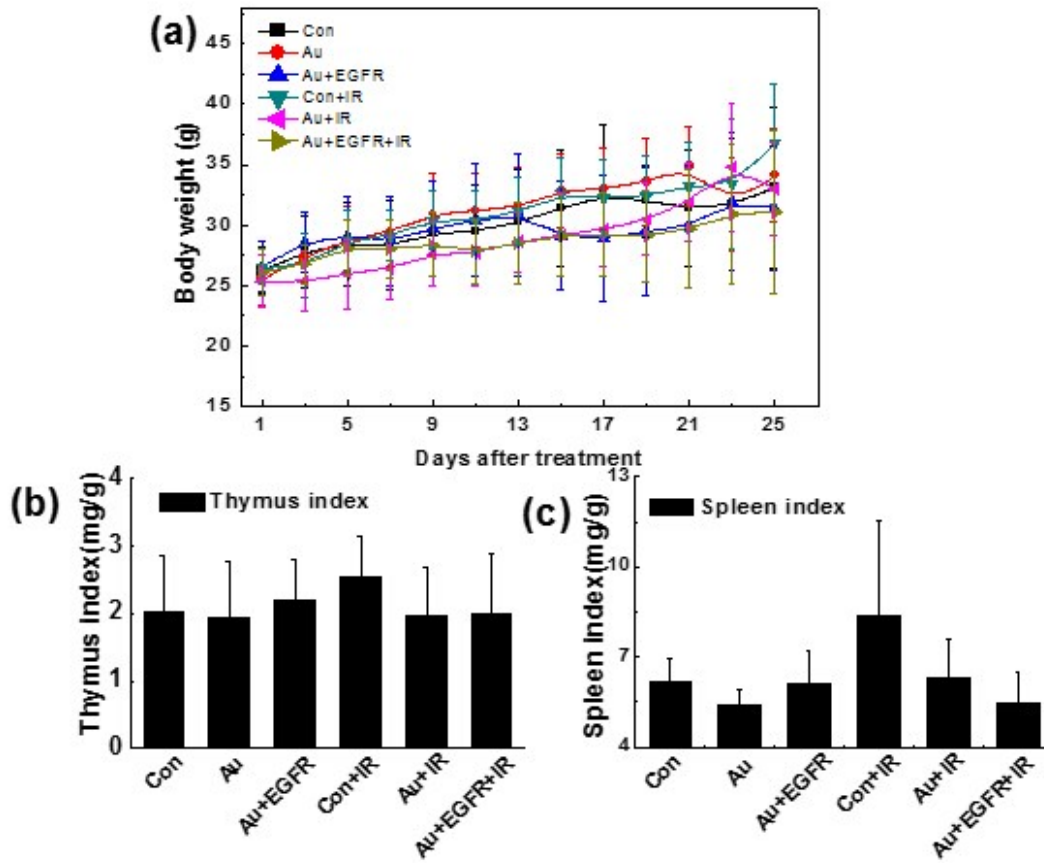

**Figure S1** (a) Body weight, (b) thymus, and (c) spleen index of the mice treated with the gold clusters and EGFR-gold clusters.
